# Supplementary material
Source: publisher site journal article supplement (https://www.dovepress.com/get_supplementary_file.php?f=257661-supplementary-file-1.xlsx)
Supplement: Supplementary file 1 [file get_supplementary_file.php]

## Sheet: Sheet1
ID	Group	Resistant/Intolerant to	Gender	Age	Phase of Disease	ACAs	MMR	EFS	Time of EFS (Months)	PES	Time of PFS (Months)	At the time of initial diagnosis												At the time of NGS detection
												WBC (*109/L)	HGB(g/L)	PLT(*109/L)	EOS (%)	BASO(%)	BM blast (%)	spleen size（subcostal length/cm）	karyotype analysis	SOKAL	SOKAL rating	EUTOS	EUTOS rating	WBC (*109/L)	HGB(g/L)	PLT(*109/L)	EOS (%)	BASO(%)	karyotype analysis
B1	TKIs-resistance	Imatinib	Female	61	CP	NA	NA	0	17	0	17	201	99	234		3	1		46,XY,t(9;22)(q34;q11)[20]	0.33	Low	66	Low	3.05	111	109	0.7	3.3
B10	TKIs-resistance	Imatinib	Male	42	CP	NA	NA	1	11	0	17								No cell was found for analysis	1.12	Medium	57.6	Low	7.62	121	245	0.4	4.1	46,XY[20]
B11	TKIs-resistance	Imatinib	Female	36	CP		NA	0	95	0	95	302.35	97	340	1.2	3.2	0	6.3		0.78	Low	87.6	High	4.6	121	144	0.2	1.1
B12	TKIs-resistance	Imatinib	Female	39	CP	Minor	NA	1	42	0	48								46,XX,t(9;22)(q34;q11)[8]	1.4	High	88	High	5.54	111	275	0.4	1.6	46,XX,t(9;22)(q34;q11)[7]/46,idem,t(9;17)(q21;q25)[2]/46,XX[11]
B13	TKIs-resistance	Dasatinib	Male	40	CP	NA	NA	1	45	0	58				2.7		1.5	4	46,XY,t(9;22)(q34;q11) [5]	0.6	Low	44	Low	9.52	150	105	0.3	0.3	46,XY,t(9;22)(q34;q11)[20]
B14	TKIs-resistance	Dasatinib	Male	48	CP	NA	NA	0	86	0	86					1.5	1		No cell was found for analysis	0.23	Low	55	Low	6.85	109	229	0.4	3.1	No cell was found for analysis
B15	TKIs-resistance	Nilotinib	Male	35	CP	NA	NA	0	9	0	9	216.25	102	516		2.5	1		46,XY,t(9;22)(q34;q11)[20]	1.34	Low	77	Low	4.09	136	97	0.2	2
B16	TKIs-resistance	Dasatinib	Female	43	CP	NA	NA	1	75	0	88	406.54	80	1197	3.5	5.5	1	8		1	Medium	94.4	High	5.62	110	77	0.5	0.2	46,XX,t(9;22)(q34;q11)[20]
B17	TKIs-resistance	Dasatinib	Female	51	CP	Minor	NA	0	72	0	72								45~46,XX,der(7)t(3;7)(p14;q21),t(9;22)(q34;q11),del(10)(q11),-12,-17,+der(22)t(9;22)[cp15]	1.45	High	110	High	3.35	49	17	0	0.3	45~46,XX,del(X)(q22),add(6)(q21),der(7)t(3;7)(p14;q21),t(9;22)(q34;q11),del(10)(q11),-12,-17,+der(22)t(9;22)[cp20]
B18	TKIs-resistance	Nilotinib	Male	49	CP	NA	NA	0	73	0	73									1.54	High	89	High	4.27	127	166	0.2	1.9	46,XY[20]
B19	TKIs-resistance	Unknown	Male	47	BP	NA	NA	1	39	1	39	208.87	111	326	3	1	2.5	23	46,XY,t(9;22)(q34;q11)[20]	0.89	Medium	47	Low	5.7	127	140	0.4	0.9	46,XY [20]
B20	TKIs-resistance	Dasatinib	Female	45	CP	Minor	NA	0	43	0	43	203.2	86	538		3.4				0.88	Medium	46	Low	6	92	70	0.2	0.3	46,XX,t(3;9;22)(p21;q34;q11) [15]
B21	TKIs-resistance	Dasatinib	Male	40	CP	Minor	NA	1	67	0	77					15.5	1		46,XY,t(9;22)(q34;q11) [6]	1.56	High	98	High	5.05	87	16	2.2	0	46,XY,t(2;20)(q32;p13),t(9;22)(q34;q11)[16]
B22	TKIs-resistance	Imatinib	Female	34	CP		NA	0	11	0	11	108.4	90	663	2.1	4.5	6	6.9		1.51	High	40.1	Low	36.88	74	1126	9.4	2
B23	TKIs-resistance	Dasatinib	Male	31	CP	NA	NA	0	90	0	90	32.95	126	676	2.1	3	2		46,XY,t(9;22)(q34;q11) [10]	0.43	Low	23	Low	6.64	139	178	0.8	2.1
B24	TKIs-resistance	Imatinib	Female	34	CP	NA	NA	0	12	0	12	139.96	125	446	2.1	2	0.5	0	46,XX,t(9;22)(q34;q11)[4]	0.53	Low	30.1	Low	3.24	114	178	0.6	3.7
B25	TKIs-resistance	Nilotinib	Male	64	BP		NA	1	2	1	2									0.98	Medium	68	Low
B26	TKIs-resistance	Imatinib	Male	48	BP	NA	NA	1	17	1	17	107	108	616	3.6	4.7	0	6.1	46,XY,t(9;22)(q34;q11) [10]	0.8	Low	46.3	Low	16.81	152	178	5.2	2.1
B28	TKIs-resistance	Dasatinib	Male	36	BP	NA	NA	1	108	1	108							6.8	46,XY,t(9;22)(q34;q11) [20]	0.98	Medium	44	Low	2.72	147	31	0.7	0
B29	TKIs-resistance	Dasatinib	Male	54	AP	Major	NA	1	82	1	82								46,XY,t(9;22;10)(q34;q11;q24)[2]/47,sl,+8[8]/48,sdl1,+der(22)t(9;22)(q34;q11)[10]/46,XY[5]	0.22	Low	36	Low	4.46	88	186	1.3	0.2
B3	TKIs-resistance	Imatinib	Female	59	CP	NA	CMR	0	63	0	63									0.45	Low	32	Low	5.16	114	133	0.2	0.4	46,XX[20]
B30	TKIs-resistance	Nilotinib	Male	39	CP	NA	NA	0	71	0	71									0.89	Medium	67	Low	6.82	165	191	0.3	0.7	46,XY[20]
B31	TKIs-resistance	Dasatinib	Female	39	CP	NA	NA	1	39	0	46								46,XX,t(9;22)(q34;q11)[20]	0.96	Medium	68	Low	2.58	73	105	0	1.2
B42	TKIs-resistance	Imatinib	Male	43	AP	Major	NA	1	129	0	134							0		0.89	Medium	65	Low	35.25	83	12	0.6	0	47,XY,+8,der(9)t(9;22)(q34;q11)[10]
B49	TKIs-resistance	Dasatinib	Male	41	BC	Major	NA	1	0	1	0							23	46,XY,t(9;22)(q34;q11)[16]	1.13	High	88	High	28.2	111	33	0.2	1.3	47,XY,+8,t(9;22)(q34;q11)[8]/48,idem,+8[12]
B5	TKIs-resistance	Imatinib	Male	41	CP		NA	0	9	0	9	161.6	140	383				0		0.53	Low	45.6	Low	3.61	124	156	0.5	3.6
B50	TKIs-resistance	Unknown	Female	46	BP	NA	NA	1	20	1	20	222.72							46,XX,t(9;22)(q34;q11) [3]/44~46,idem,-4,+5,+(6)(q25),(i7)(q10),+(12)(p13),-14,+19[cp9]	1.38	High	97	High	149.87	91	26	0	0.1	46,XX,t(9;22)(q34;q11)[20]
B51	TKIs-resistance	Nilotinib	Female	61	BP	NA	NA	1	22	1	22								46,XX,t(9;22)(q34;q11)[1]/46,XX[10]	1.43	High	102	High	4.57	103	157	0.7	0.2
B52	TKIs-resistance	Unknown	Male	30	BP	NA	NA	1	29	1	29	349.82	66	49				4.5	46,XY,t(9;22)(q34;q11)[16]	1.52	High	112	High	1.93	70	57	0	0.5
B53	TKIs-resistance	Nilotinib	Male	49	CP	Major	NA	1	124	0	139								46,XY,t(9;22)(q34;q11)[1]/46,XY[4]	0.77	Low	65	Low	10.76	81	291	2.3	2.2	47,XY,t(9;22)(q34;q11)[7]/47,idem,+der(22)t(9;22)[3]/46,XY[10][12]
B54	TKIs-resistance	Dasatinib	Male	56	AP	NA	NA	1	0	1	0	196	94	744		19	12	23	No cell was found for analysis	0.98	Medium	89	High	76.57	92	618	4.1	18
B55	TKIs-resistance	Nilotinib	Male	66	CP		NA	0	149	0	149									0.66	Low	45	Low
B59	TKIs-resistance	Imatinib	Male	51	CP	NA	NA	1	12	1	12	273.06	94	184				7.9	46,XY,t(9;22)(q34;q11)[18]/46,XY[22]	0.98	Medium	92	High	4.53	117	216	0.2	0.7
B6	TKIs-resistance	Imatinib	Female	33	CP	NA	CMR	0	27	0	27	110.9	72	1100	1	1.1	0	3.9	46,XX,t(9;22)(q34;q11) [6]	0.99	Medium	76	Low	36.23	60	973	4.5	0.7
B61	TKIs-resistance	Dasatinib	Male	49	BP		NA	1	5	1	5						1.5			1.01	Medium	87.4	High
B63	TKIs-resistance	Imatinib	Male	41	CP	NA	NA	0	9	0	9									1.13	Medium	96	High	5	158	159	0.4	6.6	46,XY[20]
B64	TKIs-resistance	Imatinib	Male	41	CP	NA	NA	0	12	0	12						17	15	46,XY,t(9;22)(q34;q11),inc[7]	1.35	High	98	High	3.9	137	113	2.6	2.6	46,XY[20]
B65	TKIs-resistance	Dasatinib	Male	43	BP		NA	1	11	1	12	185.18	88	813			8	2		1.11	Medium	88.8	High	29.16	98	34	0.2	0.1
B66	TKIs-resistance	Dasatinib	Female	32	CP	NA	NA	1	4	0	5								46,XX,t(9;22)(q34;q11)[16]/46,XX[4]	0.78	Low	56.3	Low	48.3	112	639	9.7	3
B7	TKIs-resistance	Imatinib	Female	62	CP		CMR	1	16	0	29		105	1099		1.4				1.19	Medium	23.3	Low	7.8	121	125	0.1	0.3
B8	TKIs-resistance	Imatinib	Male	62	CP		NA	0	40	0	40	61.56	131	226	1.1			0		0.7	Low	7	Low	4.71	133	192	0.2	3.2
B9	TKIs-resistance	Imatinib	Female	32	CP	NA	NA	0	16	0	16	206.58	88	734		4.4	0		46,XX,t(9;22)(q34;q11)[8]	0.44	Low	23.1	Low	5.16	97	253	0.2	2.1
C2	TKIs-intolerance	Imatinib	Female	54	CP	NA	MMR	0	48	0	48	92.71	65	1790		4	5		46,XX,t(9;22)(q34;q11) [22]	0.89	Medium	56	Low	5.18	114	87	0.4	5.4	46,XX,t(9;22)(q34;q11) [20]/46,XX[2]
C27	TKIs-intolerance	Dasatinib	Male	56	CP		NA	1	65	0	75									0.89	Medium	58.7	Low	11.8	131	119	2.9	1.9
C32	TKIs-intolerance	Dasatinib	Female	49	CP		NA	0	17	0	17	373	100	845	1.3	2	3	6.6		1.18	Medium	54.4	Low	4.6	97	93	0.2	0.9
C33	TKIs-intolerance	Nilotinib	Female	65	CP		NA	1	123	0	165	85.25	97	1163	2.6			0		2.24	High	89.5	High	4.09	106	129	0.7	0.5
C34	TKIs-intolerance	Dasatinib	Female	48	CP	NA	NA	0	25	0	25	209.55	100	548	3.7	4.5	3		46,XX,t(9;22)(q34;q11)[20]	0.89	Medium	33.2	Low	2.79	95	34	0	0	46,XX,t(9;22)(q34;q11)[20]
C35	TKIs-intolerance	Dasatinib	Male	33	CP	NA	NA	1	24	1	24								46,XY,t(9;22)(q34;q11)[20]	1	Medium	56.4	Low	3.38	122	82	0.6	2.1	46,XY,t(9;22)(q34;q11)[20]
C36	TKIs-intolerance	Dasatinib	Male	40	CP	NA	NA	1	15	0	16	508	91	470	3.4	14.5	0.5	23	46,XY,t(9;22)(q34;q11)[20]	0.84	Medium	101	High	5.62	129	142	0.2	3.9	46,XY,t(9;22)(q34;q11) [5]
C37	TKIs-intolerance	Dasatinib	Female	49	BP	NA	NA	1	52	1	52	154.7	60	565				2.4		2.32	High	98.8	High	7.33	62	140	0.3	0.1	46,XX,t(9;22)(q34;q11) [20]
C38	TKIs-intolerance	Dasatinib	Male	48	CP	NA	NA	1	28	0	72							0		1.11	Medium	86.7	Low	4.81	111	79	0.4	1.7	46,XY,t(9;22)(q34;q11) [4]/46,XY[2]
C39	TKIs-intolerance	Dasatinib	Male	31	AP	Major	NA	1	81	1	96									1.12	Medium	78.9	Low	1.48	47	6	2	0	46,XY,t(9;22)(q34;q11)[10]/46,idem,i(17)(q10)[2]
C4	TKIs-intolerance	Imatinib	Male	53	CP	NA	MMR	0	24	0	24	37.02	100	964	4.2	2	5	0	46,XY,t(9;22)(q34;q11) [10]	0.98	Medium	44.8	Low	4.61	91	172	0.4	8.9
C40	TKIs-intolerance	Nilotinib	Male	54	CP	NA	NA	0	41	0	41	382.58	67	559	5.1	10	7.5	5.7	46,XY,t(9;22)(q34;q11)	1.85	High	85.1	High	4.02	110	94	0.2	0.2
C41	TKIs-intolerance	Dasatinib	Female	53	CP	NA	NA	0	66	0	66	232.03	77	618	1.6	3.5	3.5		46,XX,t(9;22)(q34;q11) [10]	1.16	Medium	45.5	Low	3.55	114	14	0.3	0.6	46,XX,t(9;22)(q34;q11) [20]
C43	TKIs-intolerance	Dasatinib	Female	48	AP	Minor	NA	1	37	1	37								45,XX,-7,t(9;22)(q34;q11) [20]	0.34	Low	24.5	Low	10.42	70	361	0	0.2
C44	TKIs-intolerance	Dasatinib	Male	60	CP		NA	1	40	0	40							7.3		0.88	Medium	67.5	Low
C45	TKIs-intolerance	Dasatinib	Female	40	BP	Major	NA	1	8	1	8	343.16	80	225	7	5.7	1.5	4	46,XX,t(9;22)(q34;q11) [5]	0.76	Low	55.9	Low	2.92	107	75	0.7	1.4	46,XX,t(9;22)(q34;q11)[2]/47,idem,+8[4]/47,XX,+8[8]/46,XX[6]
C46	TKIs-intolerance	Dasatinib	Female	53	CP	NA	NA	0	36	0	36	484.83	69	307	6.5	4	3		46,XX,t(9;22)(q34;q11) [10]	1.24	High	84	Low	6.13	110	76	0.3	0.3
C47	TKIs-intolerance	Unknown	Male	48	AP	Major	NA	1	100	1	100								46,XY,der(22)t(9;22)(q34;q11)[3]/46,XY[28]	0.11	Low	11.4	Low	3.1	43	109	0.3	0	46,XY,i(17)(q10)[8]/46,XY [2]
C56	TKIs-intolerance	Unknown	Female	40	CP		NA	0	60	0	67									0.45	Low	34	Low	1.67	101	50	0.6	1.8
C58	TKIs-intolerance	Nilotinib	Male	64	CP		NA	1	154	0	157									0.65	Low	28.2	Low	4.77	123	74	1	0.2
C60	TKIs-intolerance	Nilotinib	Male	53	CP	NA	NA	1	16	0	23								46,XY,t(9;22)(q34;q11)[18]/46,XY[2]	1.12	Medium	89	High	4.73	120	108	0.2	4.7

## Sheet: Sheet2
排序	ID	排序	初查染色体核型
B1	B1	B1	46,XY,t(9;22)(q34;q11)
B10	B10	B10	未找到分析细胞
B11	B11	B11
B12	B12	B12	46,XX,t(9;22)(q34;q11)[8]
B13	B13	B13	46,XY,t(9;22)(q34;q11) [5]
B14	B14	B14	无
B15	B15	B15	46,XY,t(9;22)(q34;q11)
B16	B16	B16
B17	B17	B17	45~46,XX,der(7)t(3;7)(p14;q21),t(9;22)(q34;q11),del(10)(q11),-12,-17,+der(22)t(9;22)[cp15]
B18	B18	B18
B19	B19	B19	46,XY,t(9;22)(q34;q11)
B20	B20	B20
B21	B21	B21	46,XY,t(9;22)(q34;q11) [6]
B22	B22	B22
B23	B23	B23	46,XY,t(9;22)(q34;q11) [10]
B24	B24	B24	46,XX,t(9;22)(q34;q11)[4]
B25	B25	B25
B26	B26	B26	46,XY,t(9;22)(q34;q11) [10]
B28	B28	B28	46,XY,t(9;22)(q34;q11) [20]
B29	B29	B29	46,XY,t(9;22;10)(q34;q11;q24)[2]/47,sl,+8[8]/48,sdl1,+der(22)t(9;22)(q34;q11)[10]/46,XY[5]
B3	B3	B3
B30	B30	B30
B31	B31	B31	46,XX,t(9;22)(q34;q11)[20]
B42	B42	B42
B49	B49	B49	46,XY,t(9;22)(q34;q11)[16]
B5	B5	B5
B50	B50	B50	46,XX,t(9;22)(q34;q11) [3]/44~46,idem,-4,+5,+(6)(q25),(i7)(q10),+(12)(p13),-14,+19[cp9]
B51	B51	B51	46,XX,t(9;22)(q34;q11)[1]/46,XX[10]
B52	B52	B52	46,XY,t(9;22)(q34;q11)[16]
B53	B53	B53	46,XY,t(9;22)(q34;q11)[1]/46,XY[4]
B54	B54	B54	未见细胞
B55	B55	B55
B59	B59	B59	46,XY,t(9;22)(q34;q11)[18]/46,XY[22]
B6	B6	B6	46,XX,t(9;22)(q34;q11) [6]
B61	B61	B61
B63	B63	B63	46,XY[20]
B64	B64	B64	46,XY[20]
B65	B65	B65
B66	B66	B66	46,XX,t(9;22)(q34;q11)[16]/46,XX[4]
B7	B7	B7
B8	B8	B8
B9	B9	B9	46,XX,t(9;22)(q34;q11)[8]
C2	C2	C2	46,XX,t(9;22)(q34;q11) [22]
C27	C27	C27
C32	C32	C32
C33	C33	C33
C34	C34	C34	46,XX,t(9;22)(q34;q11)
C35	C35	C35	46,XY,t(9;22)(q34;q11)
C36	C36	C36	46,XY,t(9;22)(q34;q11)
C37	C37	C37
C38	C38	C38
C39	C39	C39
C4	C4	C4	46,XY,t(9;22)(q34;q11) [10]
C40	C40	C40	46,XY,t(9;22)(q34;q11)
C41	C41	C41	46,XX,t(9;22)(q34;q11) [10]
C43	C43	C43	45,XX,-7,t(9;22)(q34;q11) [20]
C44	C44	C44
C45	C45	C45	46,XX,t(9;22)(q34;q11) [5]
C46	C46	C46	46,XX,t(9;22)(q34;q11) [10]
C47	C47	C47	46,XY,der(22)t(9;22)(q34;q11)[3]/46,XY[28]
C56	C56	C56
C58	C58	C58
C60	C60	C60	46,XY,t(9;22)(q34;q11)[18]/46,XY[2]
